# Supplementary material for: Color-tunable luminescence and temperature sensing properties of Bi3+/Sm3+ or Bi3+/Eu3+ codoped Ba2Gd2Ge4O13 phosphors
Source: Royal Society of Chemistry journal article supplement (doi:10.1039/d4dt00258j), 2024-01-01
Supplement: d4dt00258j1.pdf [file d4dt00258j1.pdf]

ESI

Color-tunable luminescence and temperature sensing properties of  
 $\text{Bi}^{3+}/\text{Sm}^{3+}$  or  $\text{Bi}^{3+}/\text{Eu}^{3+}$  codoped  $\text{Ba}_2\text{Gd}_2\text{Ge}_4\text{O}_{13}$  phosphors

Olga A. Lipina,\* Anastasia V. Chvanova, Ludmila L. Surat, Yana V. Baklanova,  
Alexander Yu. Chufarov, Alexander P. Tyutyunnik, Vladimir G. Zubkov  
*Institute of Solid State Chemistry, UB RAS, 620990 Ekaterinburg, Russia*

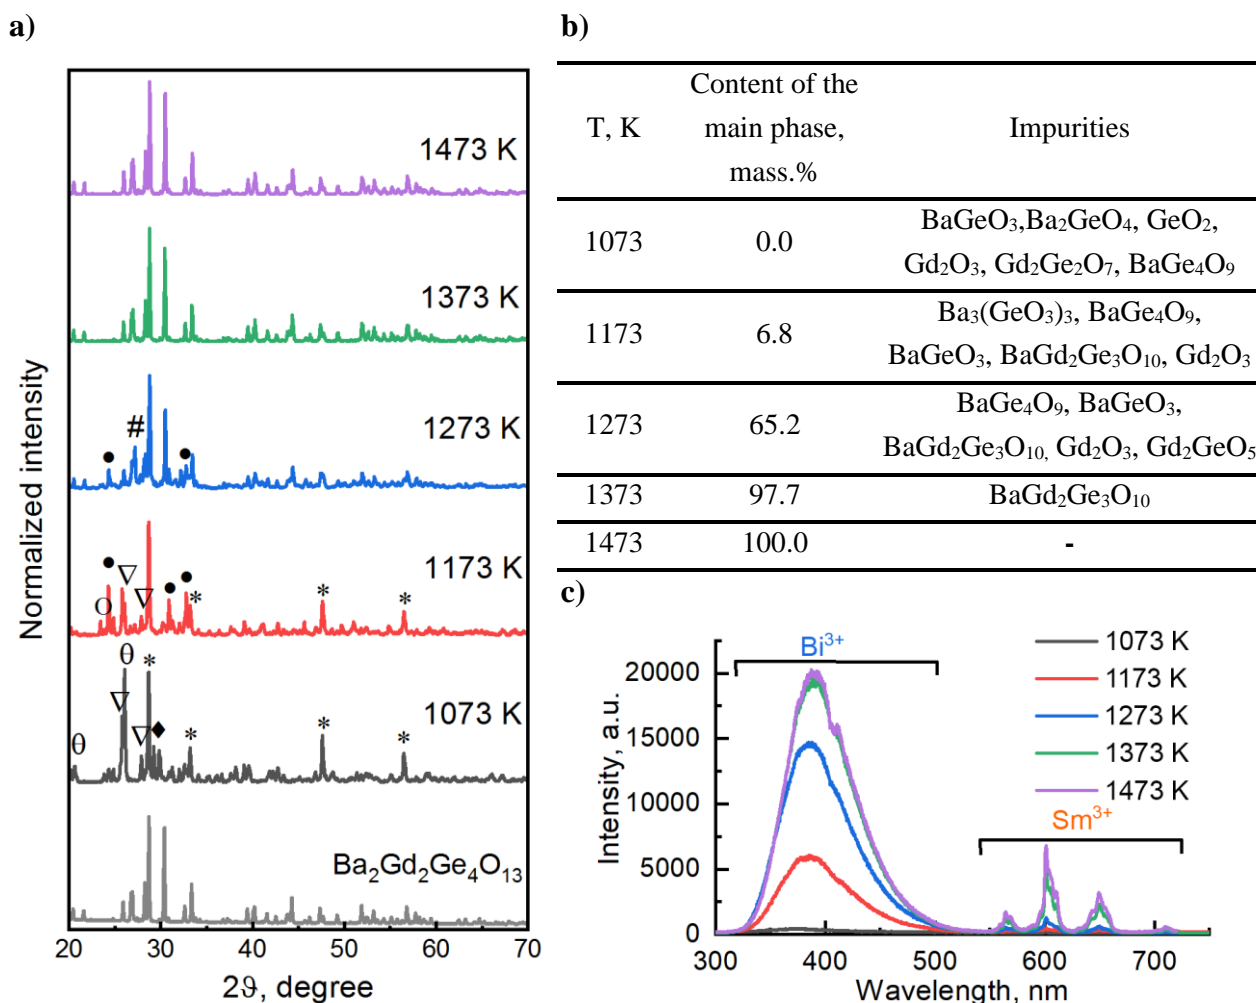

**Fig. S1** Influence of the annealing temperature on the XRPD patterns and the phase composition of the  $\text{Ba}_2\text{Gd}_{1.94}\text{Bi}_{0.01}\text{Sm}_{0.05}\text{Ge}_4\text{O}_{13}$  precursor,  $\nabla$  -  $\text{BaGeO}_3$ ,  $\bullet$  -  $\text{BaGe}_4\text{O}_9$ ,  $*$  -  $\text{Gd}_2\text{O}_3$ ,  $\circ$  -  $\text{Ba}_3(\text{GeO}_3)_3$ ,  $\#$  -  $\text{BaGd}_2\text{Ge}_3\text{O}_{10}$ ,  $\theta$  -  $\text{GeO}_2$ ,  $\blacklozenge$  -  $\text{Ba}_2\text{GeO}_4$  (a and b), the PL spectra of the  $\text{Ba}_2\text{Gd}_{1.94}\text{Bi}_{0.01}\text{Sm}_{0.05}\text{Ge}_4\text{O}_{13}$  precursor annealed at  $T = 1073, 1173, 1273, 1373$  and  $1473$  K (c).

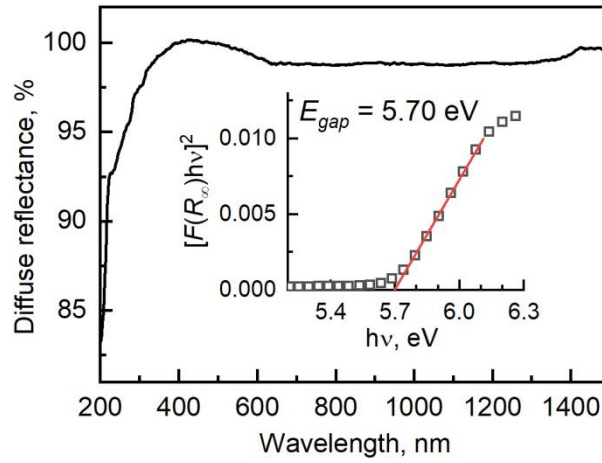

**Fig. S2** Diffuse reflectance spectrum of the  $\text{Ba}_2\text{Gd}_2\text{Ge}_4\text{O}_{13}$  host. The insets show the determination of the band gap energy.

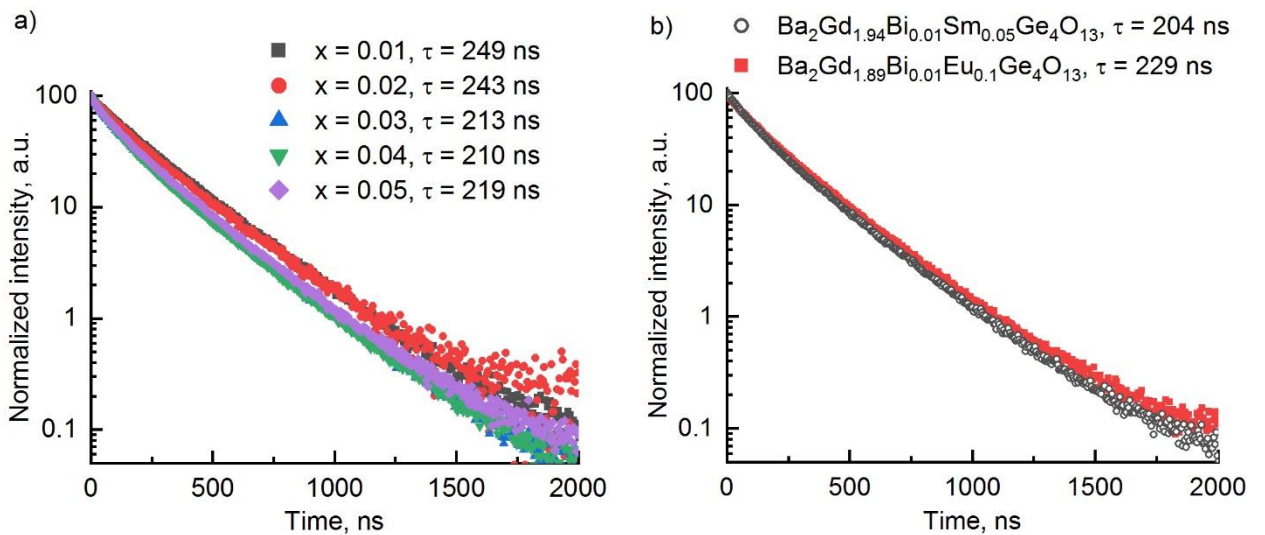

**Fig. S3** Luminescence decay curves of  $\text{Ba}_2\text{Gd}_{2-x}\text{Bi}_x\text{Ge}_4\text{O}_{13}$  (a),  $\text{Ba}_2\text{Gd}_{1.94}\text{Bi}_{0.01}\text{Sm}_{0.05}\text{Ge}_4\text{O}_{13}$  and  $\text{Ba}_2\text{Gd}_{1.89}\text{Bi}_{0.01}\text{Eu}_{0.1}\text{Ge}_4\text{O}_{13}$  (b) phosphors monitored at 386 nm under 280 nm excitation.

**Table S1** Crystallographic data for  $\text{Ba}_2\text{Gd}_{2-x}\text{Bi}_x\text{Ge}_4\text{O}_{13}$ ,  $\text{Ba}_2\text{Gd}_{1.99-x}\text{Bi}_{0.01}\text{Sm}_x\text{Ge}_4\text{O}_{13}$  and  $\text{Ba}_2\text{Gd}_{1.99-x}\text{Bi}_{0.01}\text{Eu}_x\text{Ge}_4\text{O}_{13}$

| x                                                                               | a, Å       | b, Å        | c, Å       | $\beta$ , °  | V, Å <sup>3</sup> |
|---------------------------------------------------------------------------------|------------|-------------|------------|--------------|-------------------|
| $\text{Ba}_2\text{Gd}_{2-x}\text{Bi}_x\text{Ge}_4\text{O}_{13}$                 |            |             |            |              |                   |
| 0.01                                                                            | 13.0763(2) | 5.36930(10) | 17.9936(4) | 105.120(1)   | 1219.61(4)        |
| 0.02                                                                            | 13.0758(2) | 5.36936(10) | 17.9937(4) | 105.132(1)   | 1219.52(4)        |
| 0.03                                                                            | 13.0760(2) | 5.36997(10) | 17.9939(4) | 105.135(1)   | 1219.67(4)        |
| 0.04                                                                            | 13.0770(3) | 5.37075(12) | 17.9928(4) | 105.135(2)   | 1219.86(5)        |
| 0.05                                                                            | 13.0771(2) | 5.37081(10) | 17.9934(4) | 105.136(1)   | 1219.92(4)        |
| $\text{Ba}_2\text{Gd}_{2-x}\text{Bi}_{0.01}\text{Sm}_x\text{Ge}_4\text{O}_{13}$ |            |             |            |              |                   |
| 0.05                                                                            | 13.0782(2) | 5.36950(11) | 17.9948(4) | 105.123(1)   | 1219.89(4)        |
| 0.1                                                                             | 13.0793(3) | 5.37000(11) | 17.9944(4) | 105.129(1)   | 1220.06(5)        |
| 0.15                                                                            | 13.0795(3) | 5.37040(11) | 17.9946(4) | 105.139(1)   | 1220.11(5)        |
| 0.2                                                                             | 13.0815(2) | 5.37067(9)  | 17.9947(3) | 105.142(1)   | 1220.36(4)        |
| 0.25                                                                            | 13.0825(2) | 5.37109(10) | 17.9949(4) | 105.134(1)   | 1220.60(4)        |
| 0.3                                                                             | 13.0843(4) | 5.37214(16) | 17.9961(6) | 105.154(2)   | 1220.97(6)        |
| 0.35                                                                            | 13.0877(3) | 5.37242(13) | 17.9964(5) | 105.142(2)   | 1221.44(5)        |
| 0.4                                                                             | 13.0897(3) | 5.37230(12) | 17.9978(4) | 105.148(2)   | 1221.66(5)        |
| 0.45                                                                            | 13.0906(4) | 5.37318(15) | 17.9962(5) | 105.155(2)   | 1221.80(6)        |
| 0.5                                                                             | 13.0916(3) | 5.37443(12) | 17.9982(4) | 105.170(1)   | 1222.22(5)        |
| $\text{Ba}_2\text{Gd}_{2-x}\text{Bi}_{0.01}\text{Eu}_x\text{Ge}_4\text{O}_{13}$ |            |             |            |              |                   |
| 0.1                                                                             | 13.0760(2) | 5.36944(9)  | 17.9926(3) | 105.1326(10) | 1219.47(4)        |
| 0.2                                                                             | 13.0764(2) | 5.37023(8)  | 17.9929(3) | 105.1447(9)  | 1219.63(3)        |
| 0.3                                                                             | 13.0787(2) | 5.37050(7)  | 17.9937(3) | 105.1427(8)  | 1219.98(3)        |
| 0.4                                                                             | 13.0818(2) | 5.37132(8)  | 17.9950(3) | 105.1472(10) | 1220.52(3)        |
| 0.5                                                                             | 13.0838(2) | 5.37133(7)  | 17.9967(2) | 105.1338(8)  | 1220.90(3)        |
| 0.6                                                                             | 13.0838(2) | 5.37259(7)  | 17.9950(3) | 105.1589(9)  | 1220.92(3)        |
| 0.7                                                                             | 13.0867(2) | 5.37303(8)  | 17.9962(3) | 105.1447(10) | 1221.46(3)        |
| 0.8                                                                             | 13.0883(2) | 5.37308(9)  | 17.9971(3) | 105.1500(11) | 1221.65(4)        |

**Table S2** The CIE chromaticity coordinates for  $\text{Ba}_2\text{Gd}_{1.99-x}\text{Bi}_{0.01}\text{Sm}_x\text{Ge}_4\text{O}_{13}$  and  $\text{Ba}_2\text{Gd}_{1.99-x}\text{Bi}_{0.01}\text{Eu}_x\text{Ge}_4\text{O}_{13}$  series measured under 291 nm excitation radiation.

| <b><math>\text{Ba}_2\text{Gd}_{1.99-x}\text{Bi}_{0.01}\text{Sm}_x\text{Ge}_4\text{O}_{13}</math></b> |                              |       |                    | <b><math>\text{Ba}_2\text{Gd}_{1.99-x}\text{Bi}_{0.01}\text{Eu}_x\text{Ge}_4\text{O}_{13}</math></b> |                              |       |                    |
|------------------------------------------------------------------------------------------------------|------------------------------|-------|--------------------|------------------------------------------------------------------------------------------------------|------------------------------|-------|--------------------|
| Dopant content                                                                                       | CIE chromaticity coordinates |       | Color <sup>a</sup> | Dopant content                                                                                       | CIE chromaticity coordinates |       | Color <sup>a</sup> |
|                                                                                                      | x                            | y     |                    |                                                                                                      | x                            | y     |                    |
| 0.05                                                                                                 | 0.244                        | 0.113 | purple             | 0.1                                                                                                  | 0.360                        | 0.188 | reddish-purple     |
| 0.1                                                                                                  | 0.260                        | 0.128 | purple             | 0.2                                                                                                  | 0.435                        | 0.228 | purplish-pink      |
| 0.15                                                                                                 | 0.277                        | 0.142 | purple             | 0.3                                                                                                  | 0.480                        | 0.253 | purplish-red       |
| 0.2                                                                                                  | 0.288                        | 0.152 | purple             | 0.4                                                                                                  | 0.523                        | 0.279 | purplish-red       |
| 0.25                                                                                                 | 0.292                        | 0.157 | purple             | 0.5                                                                                                  | 0.530                        | 0.278 | purplish-red       |
| 0.3                                                                                                  | 0.307                        | 0.172 | reddish-purple     | 0.6                                                                                                  | 0.536                        | 0.278 | purplish-red       |
| 0.35                                                                                                 | 0.306                        | 0.176 | reddish-purple     | 0.7                                                                                                  | 0.573                        | 0.299 | red                |
| 0.4                                                                                                  | 0.320                        | 0.189 | reddish-purple     | 0.8                                                                                                  | 0.563                        | 0.300 | red                |
| 0.45                                                                                                 | 0.327                        | 0.204 | reddish-purple     |                                                                                                      |                              |       |                    |
| 0.5                                                                                                  | 0.348                        | 0.229 | purplish-pink      |                                                                                                      |                              |       |                    |

<sup>a</sup>According to the CIE chromaticity diagram proposed in [K. L. Kelly, Color designations for lights, *J. Opt. Soc. Am.*, 1943, **33**, 627–632]

**Table S3** The CIE chromaticity coordinates for  $\text{Ba}_2\text{Gd}_{1.94}\text{Bi}_{0.01}\text{Sm}_{0.05}\text{Ge}_4\text{O}_{13}$  and  $\text{Ba}_2\text{Gd}_{1.89}\text{Bi}_{0.01}\text{Eu}_{0.1}\text{Ge}_4\text{O}_{13}$  phosphors measured at different temperatures,  $\lambda_{\text{ex}} = 280$  nm.

| <b><math>\text{Ba}_2\text{Gd}_{1.94}\text{Bi}_{0.01}\text{Sm}_{0.05}\text{Ge}_4\text{O}_{13}</math></b> |                              |       |                    | <b><math>\text{Ba}_2\text{Gd}_{1.89}\text{Bi}_{0.01}\text{Eu}_{0.1}\text{Ge}_4\text{O}_{13}</math></b> |                              |       |                    |
|---------------------------------------------------------------------------------------------------------|------------------------------|-------|--------------------|--------------------------------------------------------------------------------------------------------|------------------------------|-------|--------------------|
| T, K                                                                                                    | CIE chromaticity coordinates |       | Color <sup>a</sup> | T, K                                                                                                   | CIE chromaticity coordinates |       | Color <sup>a</sup> |
|                                                                                                         | x                            | y     |                    |                                                                                                        | x                            | y     |                    |
| 298                                                                                                     | 0.245                        | 0.109 | purple             | 298                                                                                                    | 0.358                        | 0.163 | reddish-purple     |
| 323                                                                                                     | 0.241                        | 0.110 | purple             | 323                                                                                                    | 0.331                        | 0.152 | reddish-purple     |
| 348                                                                                                     | 0.243                        | 0.117 | purple             | 348                                                                                                    | 0.320                        | 0.147 | reddish-purple     |
| 373                                                                                                     | 0.244                        | 0.121 | purple             | 373                                                                                                    | 0.309                        | 0.143 | reddish-purple     |
| 398                                                                                                     | 0.250                        | 0.129 | purple             | 398                                                                                                    | 0.301                        | 0.141 | purple             |
| 423                                                                                                     | 0.254                        | 0.137 | purple             | 423                                                                                                    | 0.298                        | 0.142 | purple             |
| 448                                                                                                     | 0.267                        | 0.154 | purple             | 448                                                                                                    | 0.300                        | 0.149 | purple             |
| 473                                                                                                     | 0.279                        | 0.166 | purple             | 473                                                                                                    | 0.311                        | 0.160 | reddish-purple     |

<sup>a</sup>According to the CIE chromaticity diagram proposed in [K. L. Kelly, Color designations for lights, *J. Opt. Soc. Am.*, 1943, **33**, 627–632]

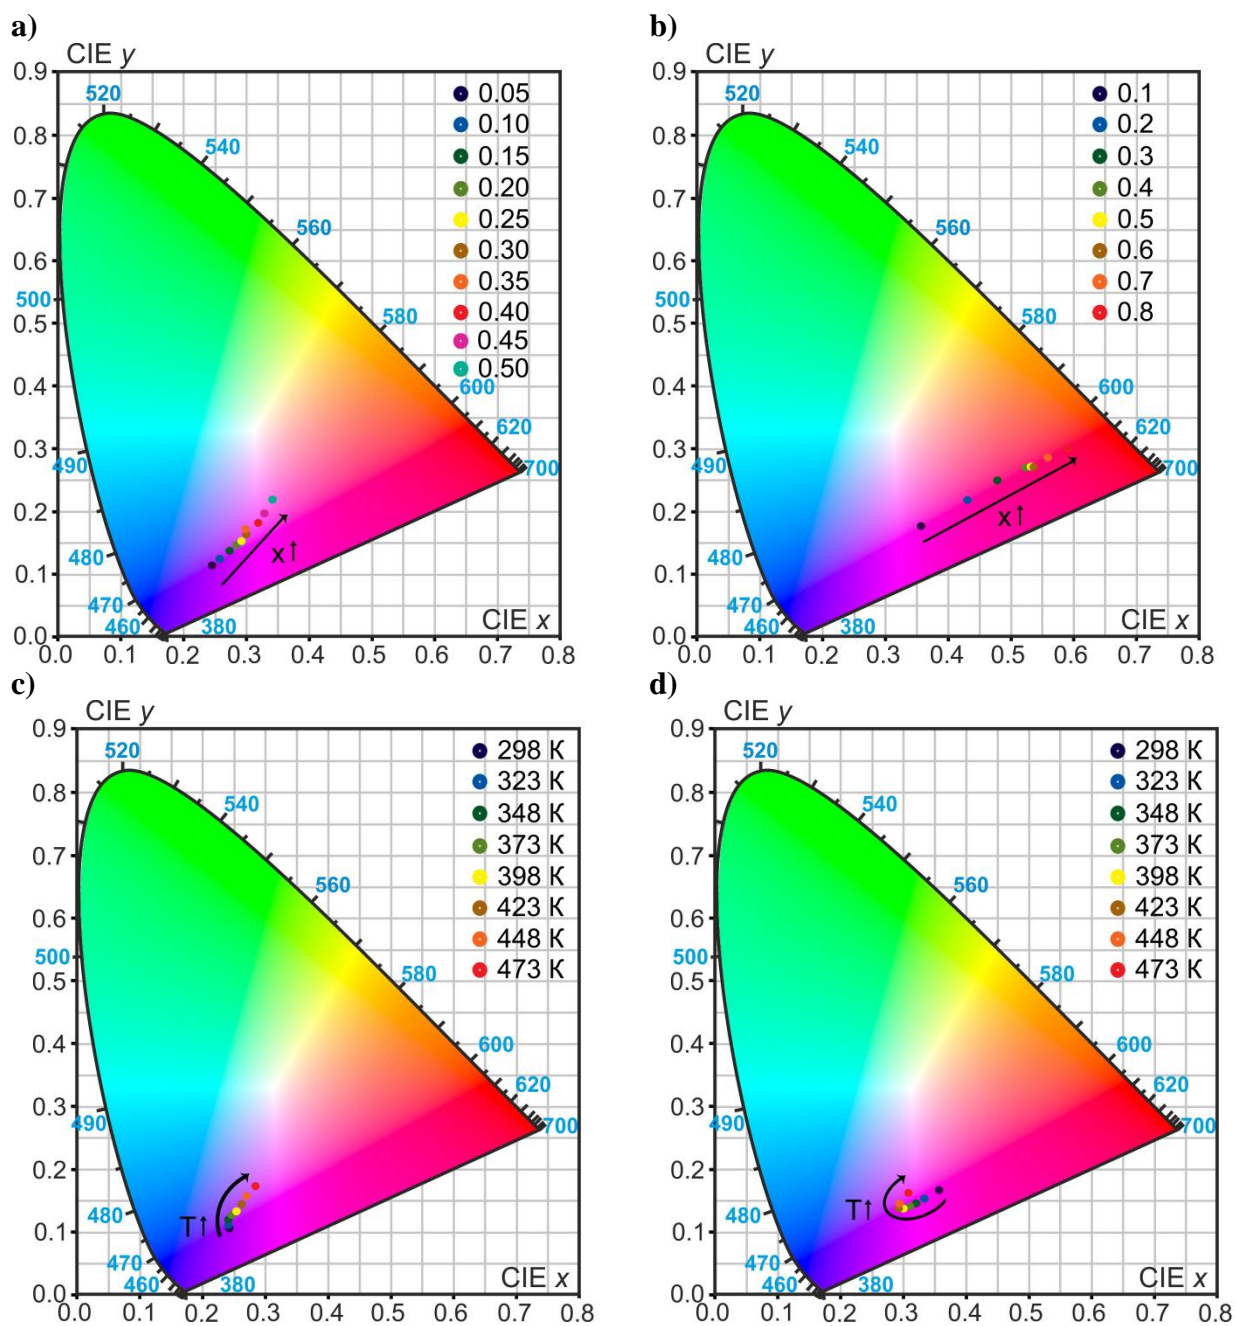

**Fig. S4** The changes of CIE chromaticity coordinates of  $\text{Ba}_2\text{Gd}_{1.99-x}\text{Bi}_{0.01}\text{Sm}_x\text{Ge}_4\text{O}_{13}$  and  $\text{Ba}_2\text{Gd}_{1.99-x}\text{Bi}_{0.01}\text{Eu}_x\text{Ge}_4\text{O}_{13}$  series with codopant concentration (a and b), the changes of CIE chromaticity coordinates of  $\text{Ba}_2\text{Gd}_{1.94}\text{Bi}_{0.01}\text{Sm}_{0.05}\text{Ge}_4\text{O}_{13}$  (c) and  $\text{Ba}_2\text{Gd}_{1.89}\text{Bi}_{0.01}\text{Eu}_{0.1}\text{Ge}_4\text{O}_{13}$  (d) with temperature.

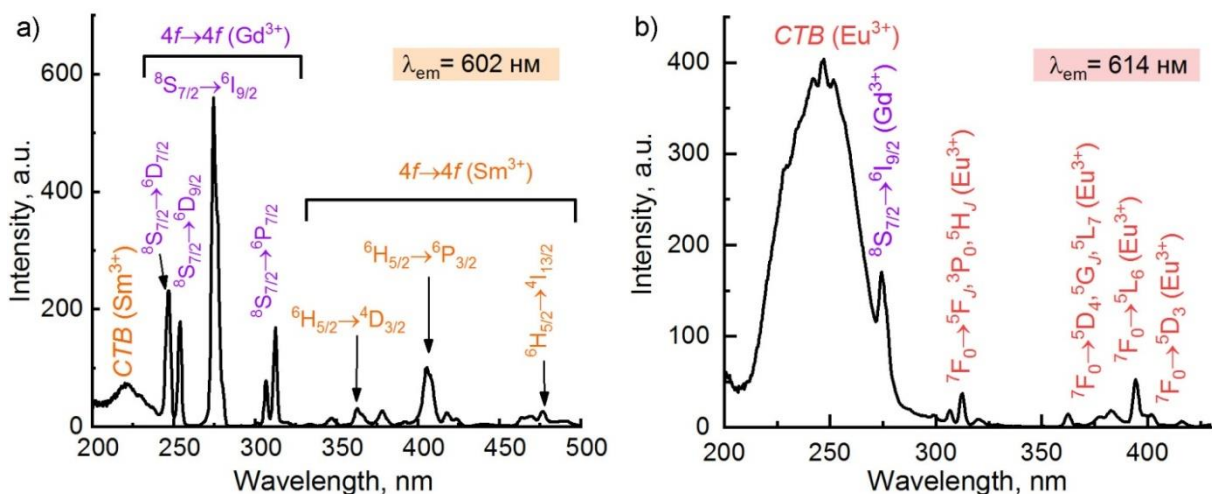

**Fig. S5** Excitation spectra of single doped germanates:  $\text{Ba}_2\text{Gd}_{1.95}\text{Sm}_{0.05}\text{Ge}_4\text{O}_{13}$ ,  $\lambda_{\text{em}} = 602$  nm (a); and  $\text{Ba}_2\text{Gd}_{1.9}\text{Eu}_{0.1}\text{Ge}_4\text{O}_{13}$ ,  $\lambda_{\text{em}} = 614$  nm (b).

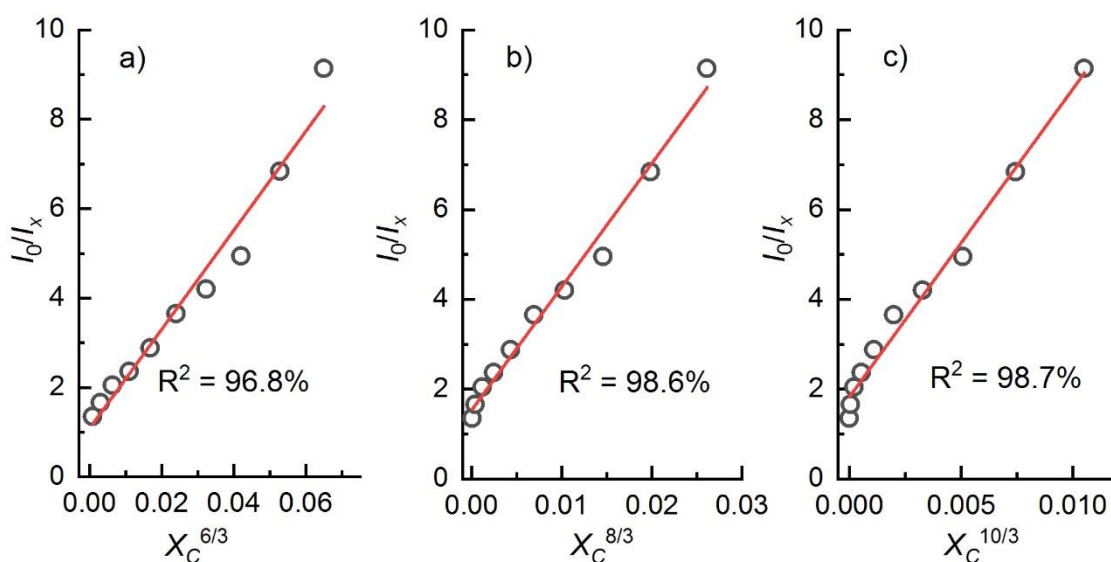

**Fig. S6** Dependences of  $I_0/I_x$  on  $X_c^{6/3}$  (a),  $X_c^{8/3}$  (b) and  $X_c^{10/3}$  (c) for  $\text{Ba}_2\text{Gd}_{1.99-x}\text{Bi}_{0.01}\text{Sm}_x\text{Ge}_4\text{O}_{13}$ .

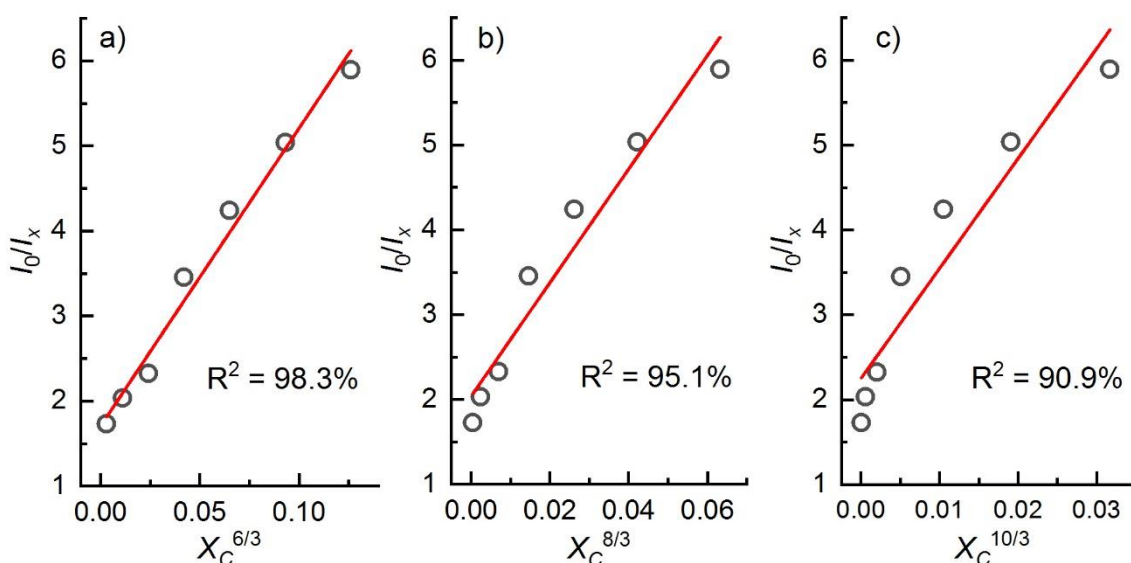

**Fig. S7** Dependences of  $I_0/I_x$  on  $X_c^{6/3}$  (a),  $X_c^{8/3}$  (b) and  $X_c^{10/3}$  (c) for  $\text{Ba}_2\text{Gd}_{1.99-x}\text{Bi}_{0.01}\text{Eu}_x\text{Ge}_4\text{O}_{13}$ .
